# Supplementary material for: Learning from High-Dimensional and Class-Imbalanced Datasets Using Random Forests
Source: MDPI journal article supplement (doi:10.3390/info12080286), 2021-07-21
Supplement: s1 [file s1]

## Supplementary Material

Additional results are provided below for each of the application domains examined in the main paper:

- cancer classification from genomic data (Table S1 and Table S2)
- text categorization (Table S3 and Table S4)
- image classification (Table S5 and Table S6)

**Table S1.** *Uterus* and *Omentum* datasets: *F-measure* and *G-mean* performance of the *RF* classifier in conjunction with data balancing (*RUS/SMOTE*) and feature selection (1% of the original features, as selected by the *IG* ranker).

| <i>Dataset</i> | <i>Performance measure</i> | <i>Baseline</i> | <i>FS alone</i> | <i>FS with RUS (3:1)</i> | <i>FS with RUS (2:1)</i> | <i>FS with RUS (1:1)</i> | <i>FS with SMOTE (3:1)</i> | <i>FS with SMOTE (2:1)</i> | <i>FS with SMOTE (1:1)</i> |                           |
|----------------|----------------------------|-----------------|-----------------|--------------------------|--------------------------|--------------------------|----------------------------|----------------------------|----------------------------|---------------------------|
| <i>Uterus</i>  | <i>F-measure</i>           | 0.26            | 0.50            | 0.62                     | 0.61                     | 0.55                     | 0.62                       | 0.64                       | 0.65                       | <i>FS before sampling</i> |
|                |                            |                 |                 | 0.62                     | 0.60                     | 0.53                     | 0.62                       | 0.63                       | 0.63                       | <i>Sampling before FS</i> |
|                | <i>G-mean</i>              | 0.38            | 0.63            | 0.84                     | 0.87                     | 0.88                     | 0.80                       | 0.83                       | 0.87                       | <i>FS before sampling</i> |
|                |                            |                 |                 | 0.84                     | 0.86                     | 0.87                     | 0.80                       | 0.82                       | 0.85                       | <i>Sampling before FS</i> |
| <i>Omentum</i> | <i>F-measure</i>           | 0.00            | 0.32            | 0.54                     | 0.51                     | 0.46                     | 0.53                       | 0.54                       | 0.56                       | <i>FS before sampling</i> |
|                |                            |                 |                 | 0.53                     | 0.50                     | 0.44                     | 0.55                       | 0.56                       | 0.55                       | <i>Sampling before FS</i> |
|                | <i>G-mean</i>              | 0.00            | 0.47            | 0.84                     | 0.86                     | 0.87                     | 0.74                       | 0.75                       | 0.79                       | <i>FS before sampling</i> |
|                |                            |                 |                 | 0.83                     | 0.86                     | 0.87                     | 0.76                       | 0.79                       | 0.81                       | <i>Sampling before FS</i> |

**Table S2.** *Uterus* and *Omentum* datasets: *F-measure* and *G-mean* performance of the *RF* classifier in conjunction with cost-sensitive methods (*MinCost/Weighting*) and feature selection (1% of the original features, as selected by the *IG* ranker).

| <i>Dataset</i> | <i>Performance measure</i> | <i>Baseline</i> | <i>FS alone</i> | <i>FS with MinCost (2)</i> | <i>FS with MinCost (3)</i> | <i>FS with MinCost (4)</i> | <i>FS with Weighting (2)</i> | <i>FS with Weighting (3)</i> | <i>FS with Weighting (4)</i> |
|----------------|----------------------------|-----------------|-----------------|----------------------------|----------------------------|----------------------------|------------------------------|------------------------------|------------------------------|
| <i>Uterus</i>  | <i>F-measure</i>           | 0.26            | 0.50            | 0.62                       | 0.64                       | 0.63                       | 0.58                         | 0.60                         | 0.60                         |
|                | <i>G-mean</i>              | 0.38            | 0.63            | 0.80                       | 0.86                       | 0.88                       | 0.72                         | 0.75                         | 0.75                         |
| <i>Omentum</i> | <i>F-measure</i>           | 0.00            | 0.32            | 0.52                       | 0.55                       | 0.57                       | 0.40                         | 0.45                         | 0.44                         |
|                | <i>G-mean</i>              | 0.00            | 0.47            | 0.70                       | 0.78                       | 0.83                       | 0.56                         | 0.61                         | 0.61                         |

**Table S3.** *Trade* and *Interest* datasets: *F-measure* and *G-mean* performance of the *RF* classifier in conjunction with data balancing (*RUS/SMOTE*) and feature selection (5% of the original features, as selected by the *IG* ranker).

| <i>Dataset</i>  | <i>Performance measure</i> | <i>Baseline</i> | <i>FS alone</i> | <i>FS with RUS (3:1)</i> | <i>FS with RUS (2:1)</i> | <i>FS with RUS (1:1)</i> | <i>FS with SMOTE (3:1)</i> | <i>FS with SMOTE (2:1)</i> | <i>FS with SMOTE (1:1)</i> |                           |
|-----------------|----------------------------|-----------------|-----------------|--------------------------|--------------------------|--------------------------|----------------------------|----------------------------|----------------------------|---------------------------|
| <i>Trade</i>    | <i>F-measure</i>           | 0.31            | 0.63            | 0.69                     | 0.62                     | 0.48                     | 0.68                       | 0.67                       | 0.66                       | <i>FS before sampling</i> |
|                 |                            |                 |                 | 0.68                     | 0.60                     | 0.46                     | 0.61                       | 0.63                       | 0.63                       | <i>Sampling before FS</i> |
|                 | <i>G-mean</i>              | 0.43            | 0.69            | 0.93                     | 0.94                     | 0.94                     | 0.74                       | 0.74                       | 0.73                       | <i>FS before sampling</i> |
|                 |                            |                 |                 | 0.93                     | 0.95                     | 0.94                     | 0.68                       | 0.69                       | 0.69                       | <i>Sampling before FS</i> |
| <i>Interest</i> | <i>F-measure</i>           | 0.53            | 0.62            | 0.69                     | 0.64                     | 0.53                     | 0.67                       | 0.67                       | 0.68                       | <i>FS before sampling</i> |
|                 |                            |                 |                 | 0.69                     | 0.63                     | 0.51                     | 0.66                       | 0.66                       | 0.65                       | <i>Sampling before FS</i> |
|                 | <i>G-mean</i>              | 0.62            | 0.71            | 0.93                     | 0.94                     | 0.95                     | 0.76                       | 0.76                       | 0.77                       | <i>FS before sampling</i> |
|                 |                            |                 |                 | 0.93                     | 0.95                     | 0.95                     | 0.74                       | 0.75                       | 0.74                       | <i>Sampling before FS</i> |

**Table S4.** *Trade* and *Interest* datasets: *F-measure* and *G-mean* performance of the *RF* classifier in conjunction with cost-sensitive methods (*MinCost/Weighting*) and feature selection (5% of the original features, as selected by the *IG* ranker).

| <i>Dataset</i>  | <i>Performance measure</i> | <i>Baseline</i> | <i>FS alone</i> | <i>FS with MinCost (2)</i> | <i>FS with MinCost (3)</i> | <i>FS with MinCost (4)</i> | <i>FS with Weighting (2)</i> | <i>FS with Weighting (3)</i> | <i>FS with Weighting (4)</i> |
|-----------------|----------------------------|-----------------|-----------------|----------------------------|----------------------------|----------------------------|------------------------------|------------------------------|------------------------------|
| <i>Trade</i>    | <i>F-measure</i>           | 0.31            | 0.63            | 0.75                       | 0.75                       | 0.72                       | 0.70                         | 0.69                         | 0.71                         |
|                 | <i>G-mean</i>              | 0.43            | 0.69            | 0.84                       | 0.90                       | 0.92                       | 0.76                         | 0.76                         | 0.77                         |
| <i>Interest</i> | <i>F-measure</i>           | 0.53            | 0.62            | 0.72                       | 0.74                       | 0.73                       | 0.67                         | 0.68                         | 0.70                         |
|                 | <i>G-mean</i>              | 0.62            | 0.71            | 0.82                       | 0.89                       | 0.92                       | 0.76                         | 0.78                         | 0.79                         |

**Table S5.** Mountain and Urban datasets: *F-measure* and *G-mean* performance of the RF classifier in conjunction with data balancing (RUS/SMOTE) and feature selection (CFS filter).

| <i>Dataset</i>  | <i>Performance measure</i> | <i>Baseline</i> | <i>FS alone</i> | <i>FS with RUS (3:1)</i> | <i>FS with RUS (2:1)</i> | <i>FS with RUS (1:1)</i> | <i>FS with SMOTE (3:1)</i> | <i>FS with SMOTE (2:1)</i> | <i>FS with SMOTE (1:1)</i> |                           |
|-----------------|----------------------------|-----------------|-----------------|--------------------------|--------------------------|--------------------------|----------------------------|----------------------------|----------------------------|---------------------------|
| <i>Mountain</i> | <i>F-measure</i>           | 0.51            | 0.55            | 0.59                     | 0.63                     | 0.61                     | 0.57                       | 0.62                       | 0.64                       | <i>FS before sampling</i> |
|                 |                            |                 |                 | 0.58                     | 0.63                     | 0.60                     | 0.57                       | 0.61                       | 0.64                       | <i>Sampling before FS</i> |
|                 | <i>G-mean</i>              | 0.60            | 0.64            | 0.68                     | 0.75                     | 0.78                     | 0.66                       | 0.72                       | 0.78                       | <i>FS before sampling</i> |
|                 |                            |                 |                 | 0.67                     | 0.75                     | 0.77                     | 0.66                       | 0.72                       | 0.77                       | <i>Sampling before FS</i> |
| <i>Urban</i>    | <i>F-measure</i>           | 0.56            | 0.58            | 0.64                     | 0.66                     | 0.61                     | 0.64                       | 0.66                       | 0.67                       | <i>FS before sampling</i> |
|                 |                            |                 |                 | 0.64                     | 0.66                     | 0.61                     | 0.64                       | 0.66                       | 0.67                       | <i>Sampling before FS</i> |
|                 | <i>G-mean</i>              | 0.64            | 0.67            | 0.75                     | 0.80                     | 0.82                     | 0.74                       | 0.77                       | 0.81                       | <i>FS before sampling</i> |
|                 |                            |                 |                 | 0.75                     | 0.81                     | 0.83                     | 0.73                       | 0.77                       | 0.81                       | <i>Sampling before FS</i> |

**Table S6.** Mountain and Urban datasets: *F-measure* and *G-mean* performance of the RF classifier in conjunction with cost-sensitive methods (*MinCost/Weighting*) and feature selection (CFS filter).

| <i>Dataset</i>  | <i>Performance measure</i> | <i>Baseline</i> | <i>FS alone</i> | <i>FS with MinCost (2)</i> | <i>FS with MinCost (3)</i> | <i>FS with MinCost (4)</i> | <i>FS with Weighting (2)</i> | <i>FS with Weighting (3)</i> | <i>FS with Weighting (4)</i> |
|-----------------|----------------------------|-----------------|-----------------|----------------------------|----------------------------|----------------------------|------------------------------|------------------------------|------------------------------|
| <i>Mountain</i> | <i>F-measure</i>           | 0.51            | 0.55            | 0.64                       | 0.61                       | 0.57                       | 0.62                         | 0.63                         | 0.64                         |
|                 | <i>G-mean</i>              | 0.60            | 0.64            | 0.78                       | 0.79                       | 0.76                       | 0.72                         | 0.75                         | 0.77                         |
| <i>Urban</i>    | <i>F-measure</i>           | 0.56            | 0.58            | 0.66                       | 0.64                       | 0.61                       | 0.65                         | 0.66                         | 0.66                         |
|                 | <i>G-mean</i>              | 0.64            | 0.67            | 0.80                       | 0.83                       | 0.83                       | 0.75                         | 0.77                         | 0.79                         |
